# Supplementary material
Source: PubMed Central journal article supplement (PMC9470571)
Supplement: 41416_2022_1895_MOESM1_ESM.pdf [file 41416_2022_1895_MOESM1_ESM.pdf]

**Supplementary Table 1. List of probe sequences and accession numbers of the targeted RNAs.**

| Target       | Accession # | Amplification | Hairpin | Fluorophore | Probe # | Probe-binding sequences                               |
|--------------|-------------|---------------|---------|-------------|---------|-------------------------------------------------------|
| <i>DLEU2</i> | NR_152566.1 | HCR v3.0      | B1      | Alexa 546   | 1       | agtgtcagataatagctcatttttagtagagggcaataaatgccacatgagat |
|              |             |               |         |             | 2       | cggactggagctcagacggccttcgccagccccccaaccacgcagatccc    |
|              |             |               |         |             | 3       | ctgacctgggcaactccccacctcgctgaaggttcgaggaccaccgctt     |
|              |             |               |         |             | 4       | aactgccactagaaaaagatgactgtcctaactaaacctgcatacacagcta  |
|              |             |               |         |             | 5       | ttgatgacaagcatagcagctccaagtcacctaataagccaaaaattt      |
|              |             |               |         |             | 6       | tgggattacaggcgtgagccaccgtaccggcccagaatctttgcctttgt    |
|              |             |               |         |             | 7       | tagtgattatgtgtggcctaagtggaattgatcaataccccaatctcaagc   |
|              |             |               |         |             | 8       | ggagctttgctgaaactgcacaaaaatcgagccggggggttccttggtccc   |
|              |             |               |         |             | 9       | gagagccagagctccgatccctgcgaggctcgagagctgccccgaacgg     |
|              |             |               |         |             | 10      | gtgcagaataacatcaatatgcaataatggtggcceaaggagcctgcacca   |
|              |             |               |         |             | 11      | cgttttacaaaaccagtgataaagccaaatgtccatttaaagtttgaca     |
|              |             |               |         |             | 12      | ctctggcttgtaacttaagtgtgtagaagcttgaaggaaatgtggactta    |
|              |             |               |         |             | 13      | attgcccttcccctcaaaaaaggtgagaactgactaaactactggtactt    |
|              |             |               |         |             | 14      | atgagattaagctgggagcagaggctgggagatcgatgctgcttgcagctg   |
|              |             |               |         |             | 15      | tccggacggagcaggtttctggaccacagacacactgccccggcgcctcc    |
|              |             |               |         |             | 16      | tccttccctggaagagcacagtggaactagatcctagtacagatagcacagg  |
|              |             |               |         |             | 17      | aactttgaaagaagcttcaaaaagaaccaagtctacaaaggcacagtt      |
|              |             |               |         |             | 18      | gtacattgttactggtgactggttgctgctggtgggctttttgtccttc     |
|              |             |               |         |             | 19      | gtgaaccagagaatggatggttcagaatcttttttttttgagatggag      |
| <i>H19</i>   | NR_002196.2 | HCR v3.0      | B2      | Alexa 546   | 1       | tctggagtctggcaggagtgatgacgggtggaggggctagctcgaggcaggg  |
|              |             |               |         |             | 2       | ggagccaggcattcatcccgtcacttttggttacaggacgtggcagctggt   |
|              |             |               |         |             | 3       | caggagagtagcaaaggtgacatcttctcggggggagccgagactgcgcaa   |
|              |             |               |         |             | 4       | cacaggggtggccagcgtagggtccagcacgtggggtggtacccaggcctg   |
|              |             |               |         |             | 5       | tacagcatccagggagtcagggtcagggcgagaccagactaggcgaggc     |

6 aagacgccagggtccgggtggacgtgacaagcaggacatgacatgggtccgggtg  
7 cggcggagacagaggaggcgctccggccttctgaacaccttaggctgggtg  
8 gctgcgcaagaagcgggtctgtttcttacttctccacggagtggcaca  
9 atggctgccctctgggctcccagaaccacaacatgaaagaaatgggtgctac  
10 agctcaagcctgggccttgaatccggacacaaaaccttagcttgaaat  
11 atatgctgactttacaaccactgactacctgactcaggaatcggctctgg  
12 ggtgaagctagaggaaaccagacctcatcagcccaacatcaaagacacatcg  
13 cccctcggcggacggttgaccaccagccaccacatcatcccagagctgagc  
14 ttgactggttgagttgtggagacggccttgagtctcagtacgagtgtgc  
15 agtctggaagctccgaccgacatcacggagcagccttcaagcattccattac  
16 cccatctgctctgtgccctccccaccagggttcagcaggagccctggac  
17 gggaagatgggggtgctggaggagagcttgtgggagccaaggagcaccttga  
18 ggtggggcctgaggccagtgaggagtgtggagtaggcgccaggcacgtgc  
19 tagctggcagcagcgggcaggtgaggacccatctgccgggcaggtgagtc  
20 tcctccccaggcctcgttccccagccttctgaaagaaggaggttagggg

---

|               |             |          |    |           |    |                                                     |
|---------------|-------------|----------|----|-----------|----|-----------------------------------------------------|
| <i>HOTAIR</i> | NR_003716.3 | HCR v3.0 | B3 | Alexa 546 | 1  | cgtctttatTTTTTaaagcccaaagagtctgatgtttacaagaccagaaa  |
|               |             |          |    |           | 2  | agctagagagagagccagaggaggaagagagcgcagacgaaggtgaaagc  |
|               |             |          |    |           | 3  | acagagagaataatccgggtcctagctgccacatgaacgccagagaacgc  |
|               |             |          |    |           | 4  | ctgggagcgctaattaattgattccttggactgtaaaatatggcggcgtc  |
|               |             |          |    |           | 5  | cacggaaccttgactcataaacaatatactgttggcgtgagtgcactg    |
|               |             |          |    |           | 6  | caggaatccacctgctgttacacgccttccaagacacagtggcaccgctt  |
|               |             |          |    |           | 7  | cccagcttgggacaaaagttgagtagaaaaatagacataggagaacactt  |
|               |             |          |    |           | 8  | agcctaggcaggcagtggggaactctgactgcctgtgctctggagcttgat |
|               |             |          |    |           | 9  | acttagaccctcaggtccctaataatcccggaggtgctcaatcagaaaggt |
|               |             |          |    |           | 10 | tgctccgcttcgagtggaatggaacggatttagaagcctgcagtaggggag |
|               |             |          |    |           | 11 | accacgcagagaaatgcaggcaaggagcaaggcggcagttcccggaacaaa |
|               |             |          |    |           | 12 | taaaagtgaaccagccctagccttgggaagcttgaaggttcagaccca    |

13 gaacttctctgctattaagattgctagagaattgtgtcttaacagtca  
14 tagctaaatagactcaggactgcacattccttgttaggtgtgtgtgtg  
15 tataagtatgcattggcgagagaagtgtgcaacctaaaccagcaattac  
16 cttgggttataggaaagcctttccctgctacttgttagaccagccaatt  
17 tggatgcaggggacttgagctgctccggaatttgagaggaacatagaagcaa  
18 gtgattatgcagtgggaccctgctgcaaacgggactttgactctaaatata

---

|               |             |          |    |           |    |                                                      |
|---------------|-------------|----------|----|-----------|----|------------------------------------------------------|
| <i>MALAT1</i> | NR_002819.4 | HCR v3.0 | B1 | Alexa 546 | 1  | GTAAAGGACTGGGGCCCCGCAACTGGCCTCTCTGCCCTTAAGCGCAGCG    |
|               |             |          |    |           | 2  | ATTTTAGCAACGCAGAAGCCCGGCCCGGAAGCCTCAGCTCGCCTGAAGGC   |
|               |             |          |    |           | 3  | GTCCCCTCTGACGCCTCCGGGAGCCCAGGTTCCAGAGTCCTTGGGACGCA   |
|               |             |          |    |           | 4  | GACGAGTTGTGCTGCTATCTTAGCTGTCCTTATAGGCTGGCCATTCCAGGTG |
|               |             |          |    |           | 5  | GGTATTTAGATAAAAACCACTCAAACCTGCAGTTTGGTCTTGGGGTTTGAG  |
|               |             |          |    |           | 6  | AAGCTTTATTTTCTTCTGCTCCGGTTCAGAAGGTCTGAAGCTCATACT     |
|               |             |          |    |           | 7  | CCAGGCATAACACAGAATCTGCAAAACAAAAACCCCTAAAAAAGCAGACCCA |
|               |             |          |    |           | 8  | GCAGTGTAACACTTCTGGGTGTGCCCTGACTGGCTGCCAAGGTCTCTGT    |
|               |             |          |    |           | 9  | CTTCGGAGACAAAGCCATTGCTTAGTTGGTCTACTTTAAAAGGCCACTTGA  |
|               |             |          |    |           | 10 | TCGCTTCCATGGCGATTTGCCTTGTGAGCACTTTCAGGAGAGCCTGGAAGC  |
|               |             |          |    |           | 11 | AAAAACGGTAGAAAAATTTCCGTGCGGGCCGTGGGGGGCTGGCGGCAACTGG |
|               |             |          |    |           | 12 | GGCCGCAGATCAGAGTGGGCCACTGGCAGCCAACGGCCCCCGGGGCTCAGGC |
|               |             |          |    |           | 13 | GGAGCAGCTCTGTGGTGTGGGATTGAGGCGTTTTCCAAGAGTGGGTTTTAC  |
|               |             |          |    |           | 14 | TTCTAAGATTTCCAAGCAGACAGCCCGTGTGCTCCGATTTCTGAACAAA    |
|               |             |          |    |           | 15 | AGCAAAACGTGTGGCTGTCTGGGAGCAAGTCGCAGGACTGCAAGCAGTTGG  |
|               |             |          |    |           | 16 | GAGAAAAGTCGCCATTTTGCCACTTCTCAACCGTCCCTGCAAGGCTGGGGCT |
|               |             |          |    |           | 17 | GTTGCGTAATGGAAAGTAAAGCCCTGAACTATCACACTTAAATCTTCCTTCA |
|               |             |          |    |           | 18 | AGGTGGTAAACTATACCTACTGTCCCTCAAGAGAACACAAGAAGTGCTTTAA |
|               |             |          |    |           | 19 | GGTATTTTAAAAGTTCCGGGGGTTTTGTGAGGTGTTTGATGACCCGTTTAAA |
|               |             |          |    |           | 20 | ATGATTTCCATGTTTCTTTGTCTAAAGTTTGCAGCTCAAATCTTCCACAC   |

---

|             |             |          |    |           |    |                                                     |
|-------------|-------------|----------|----|-----------|----|-----------------------------------------------------|
| <i>PVT1</i> | NR_003367.3 | HCR v3.0 | B2 | Alexa 546 | 1  | ccagaaggagattaaaagatgcccctcaagatggctgtgcctgtcagctgc |
|             |             |          |    |           | 2  | cttctcctgttgctgctagtgacatgagaaggacagaataacgggctccca |
|             |             |          |    |           | 3  | ttcacaagccccaccaagaggatcaccccaggaacgcttgaggctgaggag |
|             |             |          |    |           | 4  | gtctggggaataacgctggtggaacctgactggaatgacacacgcccggc  |
|             |             |          |    |           | 5  | attcttacagcttgatgtccatgggggacgaaggactgcagctggctgaga |
|             |             |          |    |           | 6  | gttgagatctctgttacttagatctctgccaacttcctttgggtctccta  |
|             |             |          |    |           | 7  | cgctcagctgggcttgagctgaccatactcctggagccttctcccagggtg |
|             |             |          |    |           | 8  | tcatctccccttgagctgctggcacgtggctcccttggtttcccctttt   |
|             |             |          |    |           | 9  | cttcagcactctggacggacttgagaactgtccttacgtgacctaagctg  |
|             |             |          |    |           | 10 | ttcatctgaggagctgcatctaccctgccatgcatagatcctgcctggt   |
|             |             |          |    |           | 11 | cactgaggctactgcatcttgagactcaggatgaagaccagctggggctg  |
|             |             |          |    |           | 12 | atcactgtgggaaaacggcagcaggaaatgtcctctgcctgctgctccac  |
|             |             |          |    |           | 13 | ggagcttctcaagtattttctgagcctgatggatttacgtgatcttcag   |
|             |             |          |    |           | 14 | gaatgtaagaccccactcttctggtgaagcatctgatgcacgttccatcc  |
|             |             |          |    |           | 15 | tcctgtgacctgtggagacacggccagatctgcctccagcctgatcttt   |
|             |             |          |    |           | 16 | catgtctgacacccatgactccaactggaccttatggctccaccagaagca |

---

|             |             |          |    |           |    |                                                      |
|-------------|-------------|----------|----|-----------|----|------------------------------------------------------|
| <i>TUG1</i> | NR_002323.2 | HCR v3.0 | B3 | Alexa 546 | 1  | gaatttggggaatgtgcgtttaggggaatgatccatcgtagcaagt       |
|             |             |          |    |           | 2  | atcctactttacatgtctaggctgtgtggttggtggaataggctctttt    |
|             |             |          |    |           | 3  | ttttgtggagtggctcaccgaagtggtaagccttaagcaagtgaacaaa    |
|             |             |          |    |           | 4  | tacagtttctgcaatagttggagcagataactttcagtgtagccacagcca  |
|             |             |          |    |           | 5  | actgttgacctgtctgtgagaaaagagacaacgactgagcaagcactaccac |
|             |             |          |    |           | 6  | tgttcacctggaccttctgactaccttccctgtgctattccatcagcctaca |
|             |             |          |    |           | 7  | cctggtacctggatttttcccagatgattcctaccaccttactactgacg   |
|             |             |          |    |           | 8  | gacaccattccagtgaccactgtgaccaggaggcattcagccatcatga    |
|             |             |          |    |           | 9  | ctgaatcctgctacaactatcttctttaccaccgtggtgacacctaagggg  |
|             |             |          |    |           | 10 | cttgaagtcttgacctccatgaatacctgaattatcagcaagcgggtttt   |
|             |             |          |    |           | 11 | agctggtgcctcattgaggccatattagagcaactgtacattgacctctt   |

12 actcctaaacagaacctcaagtctgattgaggataaggccttctctgagct  
 13 acctcatctatcgggtctggaaggaatacagcagttcgaagccgctccat  
 14 ctctcttcagtagtcagaaatgagtcgattcaccagtacacacagaact  
 15 ttagcagttcccaatccttgggtttgaacctgggaaccttgattggagt  
 16 catggtgctgccagcccagctaattaatggtgcacgtggacttttagcaagc  
 17 gctcactggaagagactgaacctggcatggaattcctgaagatggttgggt  
 18 tggccctccttggttctaattgcttgcaagtgaataactaggatgtccaag  
 19 gactccagatttcagattttcaagacctggacctggaacccgaaagagctt  
 20 aaaggcaacatcttttgagagcagcattggaccaccccacaatctcaa

---

|             |             |          |    |           |    |                                                       |
|-------------|-------------|----------|----|-----------|----|-------------------------------------------------------|
| <i>UCA1</i> | NR_015379.3 | HCR v3.0 | B1 | Alexa 546 | 1  | ctcctggaagccacaagattaggccgagagccgatcagacaaacaacctaca  |
|             |             |          |    |           | 2  | ccaaatggccatcccagcatgcttccaagcaggcttcatccgttctctgga   |
|             |             |          |    |           | 3  | aaaatacctaactggcacctttagctacataaaaaatgcaccctagacct    |
|             |             |          |    |           | 4  | catttatagcacaccaactgccgtccatctgcaggacctctccattgggtt   |
|             |             |          |    |           | 5  | ccagaccagcatccaggacaacaaaagtatggtttggttagagggt        |
|             |             |          |    |           | 6  | atgcctgattactgttttagagaactattttattaggcagttccaagct     |
|             |             |          |    |           | 7  | cacactgaagcagtcggagaaatatcagccctaccccagtaatccccaga    |
|             |             |          |    |           | 8  | gcacaaaggctttgtaaacagaggcgttcatgtggtttccttctcttc      |
|             |             |          |    |           | 9  | ctctaaaattttccacacccaaaacaaaaatctctgggtcaaaagtcta     |
|             |             |          |    |           | 10 | acaggaacctcaacccaaaggcagctctgatgaggtgtctaagataaaagtag |
|             |             |          |    |           | 11 | ctcatcttaagacctgccgctataaaaaggattatcttgagacccta       |
|             |             |          |    |           | 12 | tcagaccgacctcacacctatgggaaaaaggtaatgtatcatcggttagc    |
|             |             |          |    |           | 13 | ccttaagctcctggcagcggccagccaaggccatgcttccatgcaacctcc   |

---

|               |             |          |    |           |   |                                                     |
|---------------|-------------|----------|----|-----------|---|-----------------------------------------------------|
| <i>FILNC1</i> | NR_038399.2 | HCR v3.0 | B2 | Alexa 546 | 1 | aaagatcagacagtggtgacttgaataatgtccatgttatgattccaatct |
|               |             |          |    |           | 2 | tattagtacgttgatagataaacgtgcttgatgccaatatagacacacaaa |
|               |             |          |    |           | 3 | ggcgtataactaggttggtgcccagaataaagtataactgttgggtat    |
|               |             |          |    |           | 4 | acaaggactgtgtacttcattgaaccgtaagctgcatggttgccttggga  |

5 gaatttcctgggagatatccagtacttttgggctgtaaacagcaaaacaaa  
6 gcctttcttgaatatgctacgtctagtctactgaattcaagaagttat  
7 gtgtgggaaagtaacttgatgtctttgcaaacttacaatttgcttcagtt  
8 aacttaattcttctgtaagaactctaaacatctatgagaacatcttctc  
9 attgattcccccttctccttagtaaaaaatcctgacgttttaggtga  
10 accagaatatgatggctggagaatgtaagccatgtgcagaatgatacttac  
11 gatttcagaaagagccaacaactcctacagatgatgacagttctcattctc  
12 gcagcaataatcccaaaggaggtaaacatctaaaagaaaggaatgaaaaca  
13 aattttgacaaaaattcatctcaggaatatgtttggaataattcttgct  
14 tagatagggtttattatgctccatgtcaattatgcatgtttgtgtgat  
15 tttttcgaaggtccttaaaaatgacggttttccttgcttctttt  
16 tccttgatttaggtacgagattgtatctgtagctccagcagccatctt

---

|              |             |          |    |           |    |                                                      |
|--------------|-------------|----------|----|-----------|----|------------------------------------------------------|
| <i>NEAT1</i> | NR_028272.1 | HCR v3.0 | B3 | Alexa 546 | 1  | agggggaccacagtggggcaggctgcatggaaaatatccgagggtcccca   |
|              |             |          |    |           | 2  | ttgacctctgggagggcgccgctcttgcatactgagcagcccgggtgcgc   |
|              |             |          |    |           | 3  | ggaatagccgcagcagccctggaaatgatcaggaaggcaggcagtggtgc   |
|              |             |          |    |           | 4  | tgatgtggagtaaggcgccatcctcaccggtgactggtgcggcacctagca  |
|              |             |          |    |           | 5  | atgcttcatggaccgtggtttgttactatagtctcctcatggcgagcagat  |
|              |             |          |    |           | 6  | ggtaaaggtttcagatgctgcatcttctaaattgagcctccggtcacta    |
|              |             |          |    |           | 7  | gaagtcttagcctgatgaaataactggggcggtgaagagctgtaattt     |
|              |             |          |    |           | 8  | cattgtgttgctaaacgctgggagggtacaagtgggtcattcctaaatct   |
|              |             |          |    |           | 9  | ggagaagggaatgggggtacaccggtagtctctttgttcttctcgtt      |
|              |             |          |    |           | 10 | gtagtggtgtaagttgtgcttggaaagtgagaagttgcttagaaacttt    |
|              |             |          |    |           | 11 | tcagagggtttttgttggggtggtgttatcaagtgaattagtcact       |
|              |             |          |    |           | 12 | aagggaccactaagacgagattagatgggctcttctggattgtcctcat    |
|              |             |          |    |           | 13 | acaattactgtcgttgggatttagagtgtattagtcacgcatgtatggggaa |
|              |             |          |    |           | 14 | actggtatgttctctgtatggtaagaactaattctgttacgtcatgtacat  |
|              |             |          |    |           | 15 | ttttttccagaccaagggtgtgaaccgcctggggatgaggcctggtctt    |

16 ggaactgaacttagctcgacggggctgaccgctctggcccagggtggtatgt  
 17 ccaacgctttattttccaggtggcagtgctccttttgacttttcttaggt  
 18 gagtggctgttgagtcggtattgttgtaatggtggaggaagagaggcctt  
 19 aaccgggagacatggagtcctggccagtgtgagtcctagcattgcaggagg  
 20 agaccctggaggagagagcccctcaattgatgcctgcagattgaatttcc

---

|             |             |          |    |           |    |                                                      |
|-------------|-------------|----------|----|-----------|----|------------------------------------------------------|
| <i>GAS5</i> | NR_002578.3 | HCR v3.0 | B1 | Alexa 546 | 1  | CAGCCTCCCAgTggTCTTTgTAgACTgCCTgATggAgTCTCATggCACAAgA |
|             |             |          |    |           | 2  | CTTAATggTTCTgCTCCTggTAACgTTTTATCCATggATgACTgCTTggg   |
|             |             |          |    |           | 3  | AAgCAAgCATgCAgCTTACTgCTTgAAAgggTCTTgCCTCACCCAAGCTAgA |
|             |             |          |    |           | 4  | gTCTTTTCgAggTAggAgTCgACTCCTgTgAggTATggTgCTgggTgCAGAT |
|             |             |          |    |           | 5  | AATAgCTACTgAAgTCCTAAAgCAAgCCTAACTCAAgCCATTggCACACA   |
|             |             |          |    |           | 6  | AggACATgAAgACAgTTCCTgTCATACCTTTTAAAggTATggAgAgTCggCT |
|             |             |          |    |           | 7  | gCAGTggCCTTTgAAgCTTACTACAgCCTCAAActTCTgggCTCAAgTgATC |
|             |             |          |    |           | 8  | gAAgAAATgCaggCAgACCTgTTATCCTAAACTAgggTTTTAATgACCACA  |
|             |             |          |    |           | 9  | ACTACACTgTgTggAgCAAgTTTTAAAgAAgCAAaggACTCAGaATTCATgA |
|             |             |          |    |           | 10 | CATTAgACAgAAAgCTggAAgTTgAAATggTggAgTCCAActTgCCTggACC |
|             |             |          |    |           | 11 | ATTAAACAgTgTCTCCAATTTAATAAATTTTTgCAATCCATCAAAAAAAAA  |

---

|                   |             |          |    |           |   |                                                      |
|-------------------|-------------|----------|----|-----------|---|------------------------------------------------------|
| <i>CDKN2B-AS1</i> | NR_003529.3 | HCR v3.0 | B1 | Alexa 546 | 1 | AgCTAAgTgTCCCTTTTgATgAgAAgAATAAgCCTCATTCTgATTCAACAgC |
|                   |             |          |    |           | 2 | TTCTggTgCTgCTCgCgTCCCCgCTCCCCTATTCCCCTATTTTATTCTgg   |
|                   |             |          |    |           | 3 | CTTCACTgATATCCAAAgCATgAAggACACACCAgggAAAAACATAgACCTA |
|                   |             |          |    |           | 4 | TgCCATTTgAATCTTTgCTTCTTTCTAggTTTgACAATgAgCCTATCATATA |
|                   |             |          |    |           | 5 | ACTCATggCACATATCCATCTATCATCTgCAggggATCTgCTCACTgAAgTC |
|                   |             |          |    |           | 6 | ATgTCAgTTTTgAACTAAAAGCCgCTCCgCTCCTCTTCTAgATTTggAAAAC |
|                   |             |          |    |           | 7 | gCgAAATTAACCTAAACCgCTgCACgCCTCTgACgCgACATCTggACACggC |
|                   |             |          |    |           | 8 | TgCCACgACATTTCAAaggATTCCAAGAgAgAATATTggTgTCCATgCTgTg |
|                   |             |          |    |           | 9 | gATTCTCAgCTCCTCTCATCTgATCTCCgTCCTggCCCCATgACTTCTT    |

10 TTCCTgCAGggATTCCCTCTACAAAATTA AAAACACTgggCATgTggAAATA  
 11 AATTTgAgCTCATgTACTTAACCACTggACTACCTgCCTgCCCTgTCgAggA  
 12 AAgCATCACTgTTAggTgTgCTggAATCCTTTCCCGAgTCAgTACTgCTTTC  
 13 gAAgAAAACcggggAgATCTATTTggAATgTATCTAACTCCAAgAAACCAT  
 14 gATggAggCCTTTTTATTTgCCACAAAACCACTggTgACgTTgCCTgTggCC  
 15 TggAgAACTTCAGTAgAggAAgTggCAggAATTTgggAATgAggAgCACAgT  
 16 TTAAACTggggCCATTCATATgAgAgTTTAAgAACTCAgACCAgTgACTTAg  
 17 gTAgATTCACCATAAgTTAgCTCAGAgCAATTCAGTgCAAgTATggTCTgT  
 18 gAggCCTTTgCAGCTTTCTgCTACATggAggCTAgggCCAgAgTCAAgATTT  
 19 ATgAggCTgAgAgCATgggAgATACTAATgTgTgTTTCCTTgTgAgCTACTg  
 20 CCATAgTgAACATgTAATgCTTACCTAgTgCCAgATgCTgTCTAggCATTTT

---

|               |             |          |    |           |    |                                                        |
|---------------|-------------|----------|----|-----------|----|--------------------------------------------------------|
| <i>PTENP1</i> | NR_023917.1 | HCR v3.0 | B2 | Alexa 546 | 1  | ACAgAAATTA AACTATgCAAAAATACTATTAATAATgATgTTggATCATTAC  |
|               |             |          |    |           | 2  | gggTTCgAATAggTATgTCATCAGAgATCATATAggAATAACCAATAAgCAA   |
|               |             |          |    |           | 3  | TCggACgTCATCAAAAATAAAAAATggTTTATCTTCAAAGTCACCTgTTAAgA  |
|               |             |          |    |           | 4  | gAgATgACACTACACATTTgCCA gAATgATgATTATTA AAAAAGACCAAgTA |
|               |             |          |    |           | 5  | gAAATAgCCAATTCAGAAAACATTTTACAAGTTTTCTTTgTTTTTgTTTTTA   |
|               |             |          |    |           | 6  | CATAgAAgACAAACATCAgAAATAAACCCATCCACTATggTAAACTCATTTT   |
|               |             |          |    |           | 7  | ATgAgAAgACAAATCATAAAgCAGggAgAAATTTTTgAAA gTCATgTATCTg  |
|               |             |          |    |           | 8  | AAA ACTATgAAATTTCTAgAAgAAgACAgAAAAAAAATTATgACTTTggCTT  |
|               |             |          |    |           | 9  | TTATTATACCCTTACCCTATgACTCAGTAATTCACCTTCTAgATACCTACCA   |
|               |             |          |    |           | 10 | CACACCATACCCCAAATTA ACTCAgAACATggCATAACCAAATATAAgAg    |

---

|                  |             |          |    |           |   |                                                      |
|------------------|-------------|----------|----|-----------|---|------------------------------------------------------|
| <i>HIF1A-AS1</i> | NR_047116.1 | HCR v3.0 | B2 | Alexa 546 | 1 | gAAggAAA gACTACAgTCAACTgTCAATTggTTgATCACCCggATTTTATC |
|                  |             |          |    |           | 2 | CACCTTAgCCTATggTTgTTCATCTCgTCTCTgCCTATggCCCATTgACTCC |
|                  |             |          |    |           | 3 | gATCCCAgCTCCATTCTCggTACTTTACgCACCTgCTTCCA gTACCCCAA  |
|                  |             |          |    |           | 4 | AAATggCCA gACCCA gATgTTAAAAATgTgTTCCTTgCTCTTCTgCCCTA |
|                  |             |          |    |           | 5 | AAgggCTgTTCCATgTTTAggggATgAATgCCgCTgAgAgTATTAgCAAAA  |

6 TgCATgTgggCATCCATAgACATATTCTTAAATggCTTAaggACTTggAAAC  
7 CCTCTaggAAACCTgAAACTTgAATgTTggTCCACTAgggAgAAgAAATgTT  
8 CgCCgCCggCgCCCTCCATggTgAATCggTCCCgCgATgTCTTCACggCgg  
9 CATgTgTCATTgAgTCTgAggAAgATAACTgAgACATACaggTATTTCTCAT  
10 gAAgATAAAATAgCTgAATgAATTATCCCCgCTCCAgAACgCAgAggAAAAA  
11 AgAAgAATATATATAgCAgTAACTgTCAgCTggCgAAAAggAggAAAATTC

---

|                  |             |          |    |           |    |                                                        |
|------------------|-------------|----------|----|-----------|----|--------------------------------------------------------|
| <i>HIF1A-AS2</i> | NR_045406.1 | HCR v3.0 | B2 | Alexa 546 | 1  | TATTATTTAACATgACATTTAgggACTCAACATACATTAaggTgATggCACT   |
|                  |             |          |    |           | 2  | TgCTCAAAATATCTTTATACCAACAgggTAggCagAACATTTAggTTTAATA   |
|                  |             |          |    |           | 3  | CCAAATTTgTTCTAAgTTTgACTTTAgAgTCAggAAACTTAAgCTTACATTT   |
|                  |             |          |    |           | 4  | ATTTATTAATCTgTTAATgggAACAgATTAgAAATCTTCAgAgAAgCTCTAg   |
|                  |             |          |    |           | 5  | AgTTACACAATATTAgCATAAACTCCACAACACTACATAgggTATTgTTTTCT  |
|                  |             |          |    |           | 6  | TgTAAATggCTTTACCCATTTAAATAATAAACCATACAgCATTTAAgAATCA   |
|                  |             |          |    |           | 7  | ATTATATgATTAACAATgTCATgTTCCAaggTTTAACAATTTTCATAggCCAAA |
|                  |             |          |    |           | 8  | TTTTgTTCAgTATATATACCTCaggTAAaggACCTAaggCTCTggCACTTC    |
|                  |             |          |    |           | 9  | gATAAATgTAGAAATAACCgTACCATgTAATTTTCATAAgTgCTTAAATTg    |
|                  |             |          |    |           | 10 | TTATCCAAATAAATgCCACATACCTTCTAgATATATgCATATCTTTCTATAT   |
|                  |             |          |    |           | 11 | AACTgCCTATgATCATgATgAAAaggTACTgCCTTCTTACAAAAATTATATT   |
|                  |             |          |    |           | 12 | ggTCTgCCATCTATTACTTTTTAAAgCTTgggCAAATTATTCATTTgAAgTCT  |
|                  |             |          |    |           | 13 | AAAACAATACAgTTagTgTTagATCCAACCACAAAgAgCAAAAggAATgAAA   |
|                  |             |          |    |           | 14 | TgCTggTATTTTTTAAgAAAAATATATTgTgCAATTgTggCTACCACgTACTg  |
|                  |             |          |    |           | 15 | CATCTTCTTAAAAATAATTCgAAAAaggATAAACTCCCTAgCCAAAAATAA    |
|                  |             |          |    |           | 16 | TgTCCTCCATTgTAAgATAAAAAgAgCTACCTAAgAgATCTgTggCTCAGTT   |
|                  |             |          |    |           | 17 | TTTgTAACATTgTgACTATAATgCTgAgAACTgCTTCACTCATCCATTCAT    |
|                  |             |          |    |           | 18 | CATAAAAgCTgATCAAaggggCCTggTCCACAgAAgATgTTTATTTgATgTA   |
|                  |             |          |    |           | 19 | TgAgCTggCAAAGTgACTATAgAAACATCAgATgATTTCTCTgAATTgAgAA   |
|                  |             |          |    |           | 20 | ACCAAAAACTgAgAAAATgAgCTgTCTgTgATCCAgCATTTAAgAACATAC    |

---

|             |             |          |    |           |    |                                                       |
|-------------|-------------|----------|----|-----------|----|-------------------------------------------------------|
| <i>MEG3</i> | NR_002766.2 | HCR v3.0 | B3 | Alexa 546 | 1  | ggCgCTgTgATgCggTTCCAAAgCACAgggCTTggCgCACCCCACTgTgCTC  |
|             |             |          |    |           | 2  | CTgAATggAAggATCCCTTTgggAAATTCTCAggAgggggACCTgggCCAAG  |
|             |             |          |    |           | 3  | TTAAATgAgATAAAAgAggCCTCAggCaggATCTggCATAgAggAggTgATC  |
|             |             |          |    |           | 4  | gAAgAACTgCggATggAAgCTgCggAAgAggCCCTgATggggCCCACCATCC  |
|             |             |          |    |           | 5  | gTCTTACTTgTCTTATTTATTCTCCAACAgCACTCCAaggCAgCCCTTgTCCA |
|             |             |          |    |           | 6  | CCCgCCCTCTgACTgATggACgCCgCTgACCTggggTCAgACCCgTgggCTg  |
|             |             |          |    |           | 7  | CTTggCCAgCATCCTgCTggCAACTCCAaggCCCTgggTgggCTTCTggAAT  |
|             |             |          |    |           | 8  | CgggACAggCTggACCCAgAgACTCTggACCCggggCCTCCCTTgAgTAga   |
|             |             |          |    |           | 9  | CCCCTgCCCACCCCgCaggAACCTgAggCCTAggggAgCTgTTgAgCCTTC   |
|             |             |          |    |           | 10 | CgggTCTCTCCTCaggATgACATCATCCgTCCACCTCCTTgTCTTCAaggA   |
|             |             |          |    |           | 11 | TCCTTCCTCACCTCCAATTTCTTCAACCACTgCTTCTgACTGCTCT        |
|             |             |          |    |           | 12 | gACCCAAgTCTTCTCTCTggCgggCCTCTCgTCTCCTCCTggTTTgggCgg   |
|             |             |          |    |           | 13 | ACCTCCTCTCCATgCTgAgCTgCTgCCAaggggCCTgCTgCCCATCTACACC  |
|             |             |          |    |           | 14 | ACgAgggCACTAggAgCACggTTTCCTggATCCCACCAACATACAAAgCagC  |
|             |             |          |    |           | 15 | AgCCAgCTgTCCCTTTACCTAAAgACTTAAACCAATgCCCTAgTgAggggg   |
|             |             |          |    |           | 16 | TTgggCATTAAgCCCTgACCTTTgCTATgCTCATACTTTgACTCTATgAgTA  |
|             |             |          |    |           | 17 | TTCTATAAgTCTTTgCTTgTgTTCACCTgCTAgCAAActggAgTgTTTCCC   |
|             |             |          |    |           | 18 | CCCAAgggggTgTCAgTCTTTgTCgACTgACTCTgTCATCACCTTATgATg   |
|             |             |          |    |           | 19 | gCATgCTACTgAATCACAAAggCACgCCCgACCTCTCTgAAgATCTTCCTA   |
|             |             |          |    |           | 20 | CAAATgTTTgTTgAAAaggTTTgACAaggTCAgTCCCTTCCCACCCCTCTTgC |

---

|              |             |          |    |           |   |                                                       |
|--------------|-------------|----------|----|-----------|---|-------------------------------------------------------|
| <i>PCAT1</i> | NR_045262.2 | HCR v3.0 | B3 | Alexa 546 | 1 | ACACATggATATTggATATCTgCATAggCagCTTgCTCCACgCCggTgCCTA  |
|              |             |          |    |           | 2 | gAAgAAAaggAACCTCTTgAgTACAAAgAgCTACCTATggTggTCTggAgC   |
|              |             |          |    |           | 3 | gAggACCACAgCATCAAaggATATAAgATgCATAgCCAActgAggAACCTgA  |
|              |             |          |    |           | 4 | AATTAAAgAgATCCACAgTAAgTCACACTTAACTggCACTTgTggAAgCCC   |
|              |             |          |    |           | 5 | ACAggCCAAGCTACAgggAgAAaggAgATgACgCAAaggAACCTAACTggAC  |
|              |             |          |    |           | 6 | CCTTACAATTTggTgAgACAAGAAATgTATgAATTCCCACAggTCAAATTATA |
|              |             |          |    |           | 7 | AAggAACATTCACATCTTTCTCCCATgTgCCTCTAAgTgCCAgTgCAggCC   |

8 TAATCACTAgAAGTgAgAAGAgAAATCTATTggAACCTCCCAgATAATgCC  
9 TgTgCAgATgggAAGgAAAgAAAgTggCAAggAggCAGAgAAAgCATCTgT  
10 CAAggCCTgAAggAgAgCTgACATAggCACCCCAgAgAgCCAgaATCTggAT  
11 CATCTTAATAAggCCATgAACACCAgTggAgAAGAggCAGAAACACCAATgg  
12 gggTCAAaggTgCgCAGATACATAAgCCATggAAATAATATCAGACAAAA

**Supplementary Table 2. Reference list of studies which showed the association between expression of lncRNA and cancer survival.**

| lncRNA            | Reference                                                                                                                                                                                                                         |
|-------------------|-----------------------------------------------------------------------------------------------------------------------------------------------------------------------------------------------------------------------------------|
| <i>NEAT1</i>      | Ning L, Li Z, Wei D et al. lncRNA, NEAT1 is a prognosis biomarker and regulates cancer progression via epithelial-mesenchymal transition in clear cell renal cell carcinoma. <i>Cancer Biomark</i> 2017; 19: 75-83.               |
| <i>HOTAIR</i>     | Katayama H, Tamai K, Shibuya R et al. Long non-coding RNA HOTAIR promotes cell migration by upregulating insulin growth factor-binding protein 2 in renal cell carcinoma. <i>Sci Rep</i> 2017; 7: 12016.                          |
| <i>TUG1</i>       | Wang PQ, Wu YX, Zhong XD et al. Prognostic significance of overexpressed long non-coding RNA TUG1 in patients with clear cell renal cell carcinoma. <i>Eur Rev Med Pharmacol Sci</i> 2017; 21: 82-86.                             |
| <i>DLEU2</i>      | Qi-Dong X, Yang X, Lu JL et al. Development and Validation of a Nine-Redox-Related Long Noncoding RNA Signature in Renal Clear Cell Carcinoma. <i>Oxid Med Cell Longev</i> 2020; 2020: 6634247.                                   |
| <i>MALAT1</i>     | Ye Y, Zhang F, Chen Q et al. lncRNA MALAT1 modified progression of clear cell kidney carcinoma (KIRC) by regulation of miR-194-5p/ACVR2B signaling. <i>Mol Carcinog</i> 2019; 58: 279-292.                                        |
| <i>FILNC</i>      | Xiao ZD, Han L, Lee H et al. Energy stress-induced lncRNA FILNC1 represses c-Myc-mediated energy metabolism and inhibits renal tumor development. <i>Nat Commun</i> 2017; 8: 783.                                                 |
| <i>PVT1</i>       | Ren Y, Huang W, Weng G et al. lncRNA PVT1 promotes proliferation, invasion and epithelial-mesenchymal transition of renal cell carcinoma cells through downregulation of miR-16-5p. <i>Onco Targets Ther</i> 2019; 12: 2563-2575. |
| <i>H19</i>        | Wang L, Cai Y, Zhao X et al. Down-regulated long non-coding RNA H19 inhibits carcinogenesis of renal cell carcinoma. <i>Neoplasma</i> 2015; 62: 412-418.                                                                          |
| <i>UCA1</i>       | Liu Q, Li Y, Lv W et al. UCA1 promotes cell proliferation and invasion and inhibits apoptosis through regulation of the miR129-SOX4 pathway in renal cell carcinoma. <i>Onco Targets Ther</i> 2018; 11: 2475-2487.                |
| <i>CDKN2B-AS1</i> | Xie X, Lin J, Fan X et al. lncRNA CDKN2B-AS1 stabilized by IGF2BP3 drives the malignancy of renal clear cell carcinoma through epigenetically activating NUF2 transcription. <i>Cell Death Dis</i> 2021; 12: 201.                 |
| <i>PCAT1</i>      | Wang R, Zheng B, Liu H, Wan X. Long non-coding RNA PCAT1 drives clear cell renal cell carcinoma by upregulating YAP via sponging miR-656 and miR-539. <i>Cell Cycle</i> 2020; 19: 1122-1131.                                      |
| <i>PTENP1</i>     | Yu G, Yao W, Gumireddy K et al. Pseudogene PTENP1 functions as a competing endogenous RNA to suppress clear-cell renal cell carcinoma progression. <i>Mol Cancer Ther</i> 2014; 13: 3086-3097.                                    |
| <i>GAS5</i>       | Yang X, Xie Z, Lei X, Gan R. Long non-coding RNA GAS5 in human cancer. <i>Oncol Lett</i> 2020; 20: 2587-2594.                                                                                                                     |
| <i>MEG3</i>       | He Y, Luo Y, Liang B et al. Potential applications of MEG3 in cancer diagnosis and prognosis. <i>Oncotarget</i> 2017; 8: 73282-73295.                                                                                             |
| <i>HIF1A-AS1</i>  | Gong W, Tian M, Qiu H, Yang Z. Elevated serum level of lncRNA-HIF1A-AS1 as a novel diagnostic predictor for worse prognosis in colorectal carcinoma. <i>Cancer Biomark</i> 2017; 20: 417-424.                                     |
| <i>HIF1A-AS2</i>  | Zhang W, Liu K, Pei Y et al. Long Noncoding RNA HIF1A-AS2 Promotes Non-Small Cell Lung Cancer Progression by the miR-153-5p/S100A14 Axis. <i>Onco Targets Ther</i> 2020; 13: 8715-8722.                                           |
